# Supplementary material
Source: MDPI journal article supplement (https://www.mdpi.com/2072-4292/11/6/622)
Supplement: s1 [file s1]

Supplementary Materials:

# Exploitation of Sentinel-2 Time Series to Map Burned Areas at the National Level: A Case Study on the 2017 Italy Wildfires

Federico Filipponi

Independent Scientist, Via Michelangelo Tamburini 8, 00154 Roma, Italy; federico.filipponi@gmail.com;  
Tel.: +39-329-6139908

Received: 27 February 2019; Accepted: 09 March 2019; Published: 14 March 2019

**Table S1.** Spectral characteristics of Sentinel-2 MSI sensor.

| Spectral band | Band name            | S2A Central wavelength (nm) | S2A Band width (nm) | S2B Central wavelength (nm) | S2B Band width (nm) | Resolution (m) | Solar radiation fraction ( $\omega_{bi}$ ) <sup>1</sup> |
|---------------|----------------------|-----------------------------|---------------------|-----------------------------|---------------------|----------------|---------------------------------------------------------|
| B1            | Coastal aerosol      | 443.9                       | 27                  | 442.3                       | 45                  | 60             |                                                         |
| B2            | Blue                 | 496.6                       | 98                  | 492.1                       | 98                  | 10             | 0.1324                                                  |
| B3            | Green                | 560.0                       | 45                  | 559.0                       | 46                  | 10             | 0.1269                                                  |
| B4            | Red                  | 664.5                       | 38                  | 665.0                       | 39                  | 10             | 0.1051                                                  |
| B5            | Red edge 1           | 703.9                       | 19                  | 703.8                       | 20                  | 20             | 0.0971                                                  |
| B6            | Red edge 2           | 740.2                       | 18                  | 739.1                       | 18                  | 20             | 0.0890                                                  |
| B7            | Red edge 3           | 782.5                       | 28                  | 779.7                       | 28                  | 20             | 0.0818                                                  |
| B8            | Near infrared        | 835.1                       | 145                 | 833.0                       | 133                 | 10             | 0.0722                                                  |
| B8A           | Near infrared narrow | 864.8                       | 33                  | 864.0                       | 32                  | 20             |                                                         |
| B9            | Water vapor          | 945.0                       | 26                  | 943.2                       | 27                  | 60             |                                                         |
| B10           | SWIR Cirrus          | 1373.5                      | 75                  | 1376.9                      | 76                  | 60             |                                                         |
| B11           | Shortwave Infrared 1 | 1613.7                      | 143                 | 1610.4                      | 141                 | 20             | 0.0167                                                  |
| B12           | Shortwave Infrared 2 | 2202.4                      | 242                 | 2185.7                      | 238                 | 20             | 0.0002                                                  |

<sup>1</sup> From Vanino et al., 2018.  $\omega_{bi}$  is the weighting coefficient representing the solar radiation fraction derived from the solar irradiance spectrum with spectral response curve of each Sentinel-2 band.

**Table 2.** Layers used to generate the raster mask.

| Mask name                       | Source product              | Layer name                             |
|---------------------------------|-----------------------------|----------------------------------------|
| Water mask                      | Sentinel-2 L2A (MUSCATE)    | water_mask                             |
| Water pixel mask                | Sentinel-2 BOA reflectances | Spectral bands expression <sup>1</sup> |
| Cloud reflectance mask          | Sentinel-2 L2A (MUSCATE)    | cloud_mask_refl                        |
| Cloud reflectance variance mask | Sentinel-2 L2A (MUSCATE)    | cloud_mask_refl_var                    |
| Cloud shadow mask               | Sentinel-2 L2A (MUSCATE)    | cloud_mask_shadow                      |
| Cirrus mask                     | Sentinel-2 L2A (MUSCATE)    | cloud_mask_cirrus                      |
| Snow mask                       | Sentinel-2 L2A (MUSCATE)    | snow_mask                              |
| Edge mask                       | Sentinel-2 L2A (MUSCATE)    | edge_mask                              |
| Topographical shadows mask      | Sentinel-2 L2A (MUSCATE)    | topographical_Shadows_mask             |
| Low sun mask                    | Sentinel-2 L2A (MUSCATE)    | sun_too_low_mask                       |

<sup>1</sup> Spectral bands expression for water pixel calculation can be found in Filipponi, 2018.

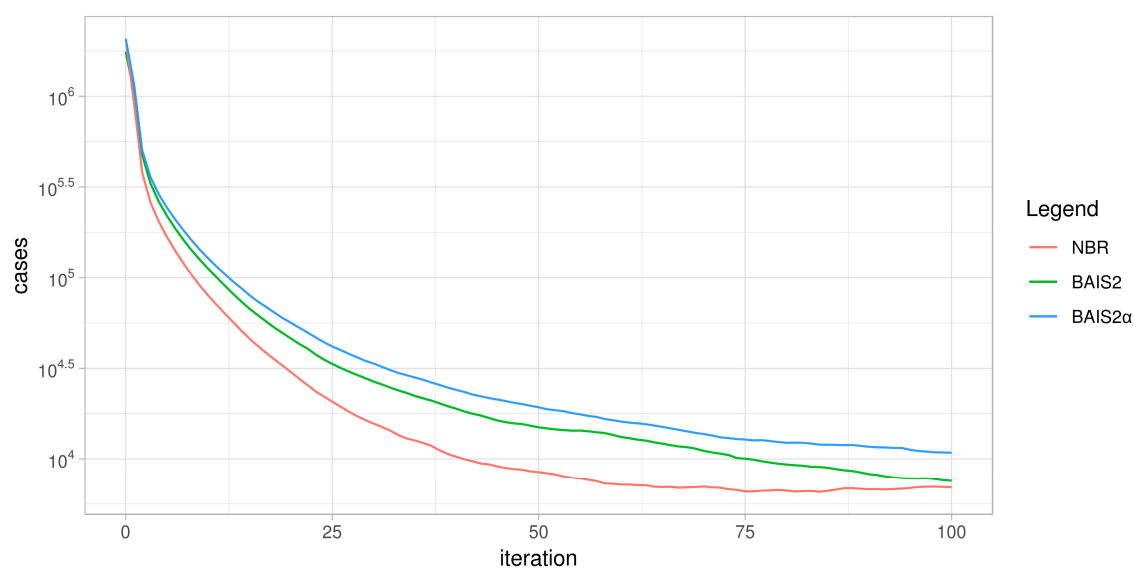

**Figure 1.** Sensitivity analysis for the maximum number of iterations used in the processing step C (growing region).

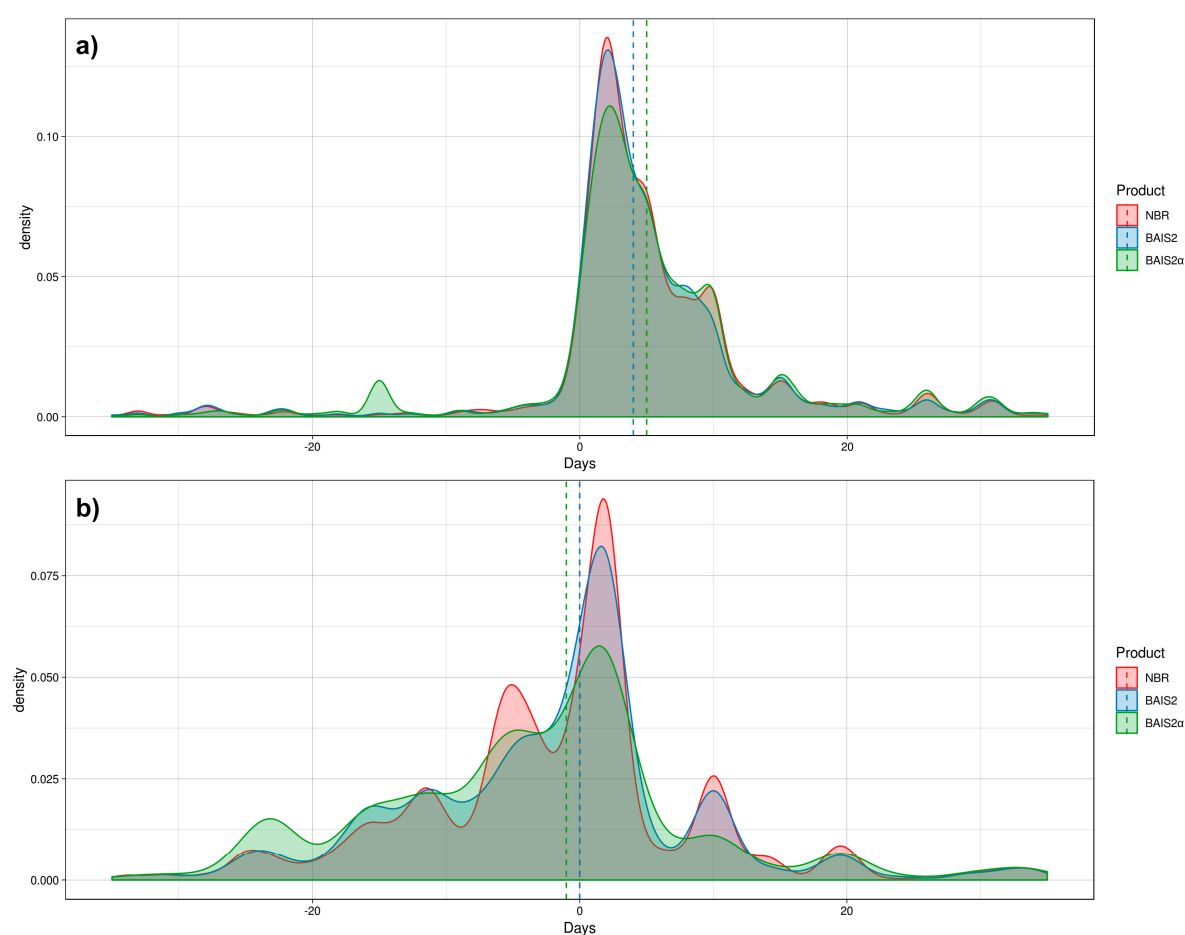

**Figure 2.** (a) Distribution of differences in days between the post-fire date identified from S2 observations and the fire date reported in the EFFIS 'MODIS burnt areas' product; (b) Distribution of differences in days between the post-fire date identified from S2 observations and the post-fire date used to produce the Copernicus EMS rapid mapping activations.

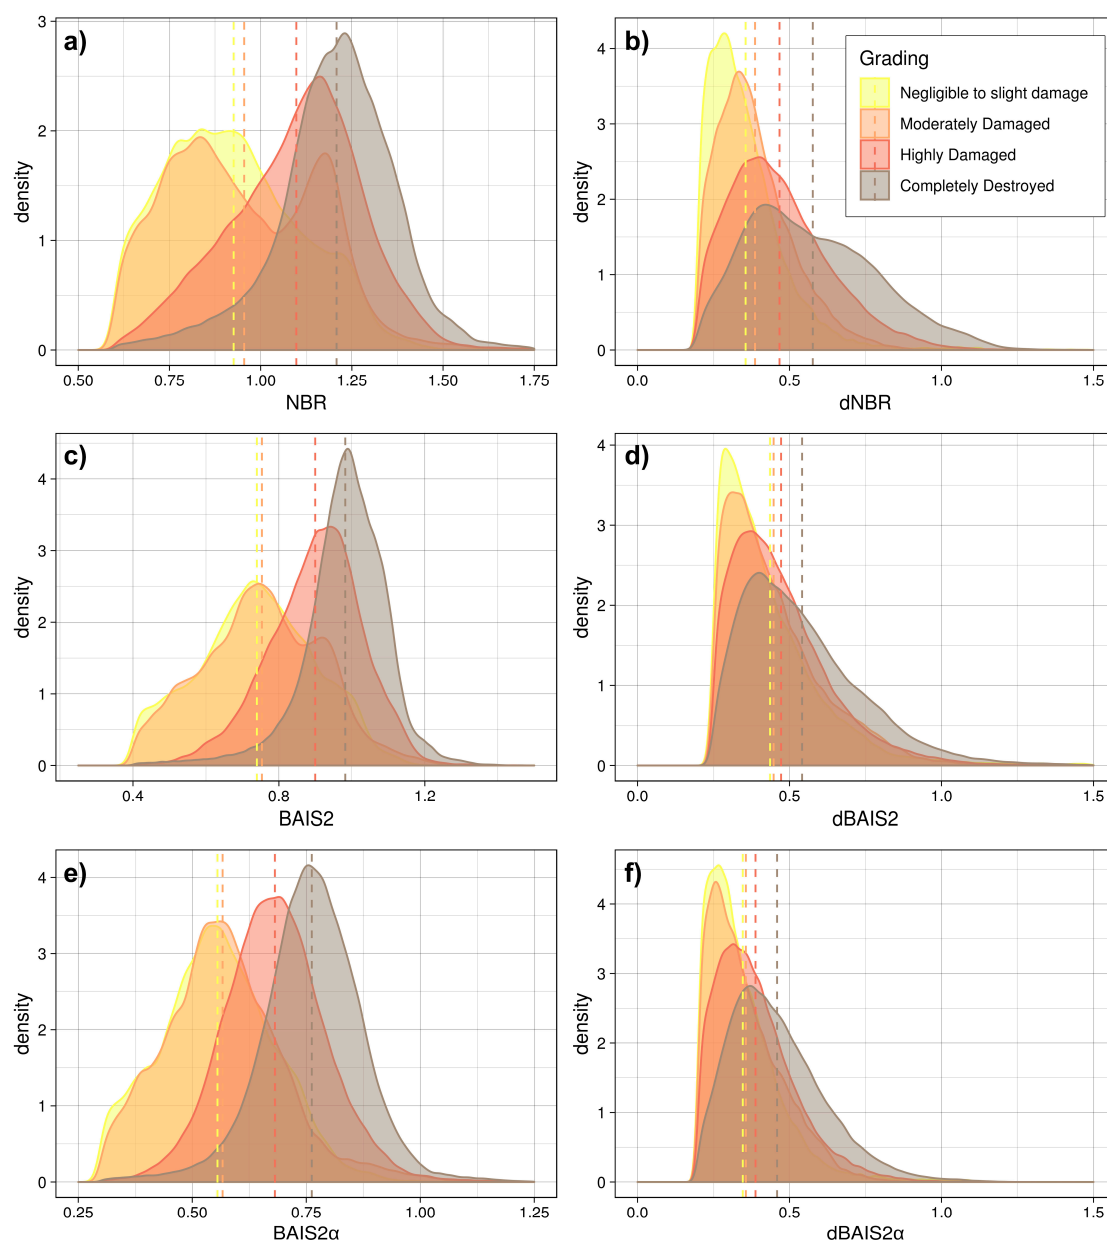

**Figure 3.** (a) Distribution of NBR index values in the identified burned areas with respect to the Copernicus EMS fire grading classes; (b) Distribution of dNBR index values in the identified burned areas with respect to the Copernicus EMS fire grading classes; (c) Distribution of BAIS2 index values in the identified burned areas with respect to the Copernicus EMS fire grading classes; (d) Distribution of dBAIS2 index values in the identified burned areas with respect to the Copernicus EMS fire grading classes; (e) Distribution of BAIS2 $\alpha$  index values in the identified burned areas with respect to the Copernicus EMS fire grading classes; (f) Distribution of dBAIS2 $\alpha$  index values in the identified burned areas with respect to the Copernicus EMS fire grading classes.

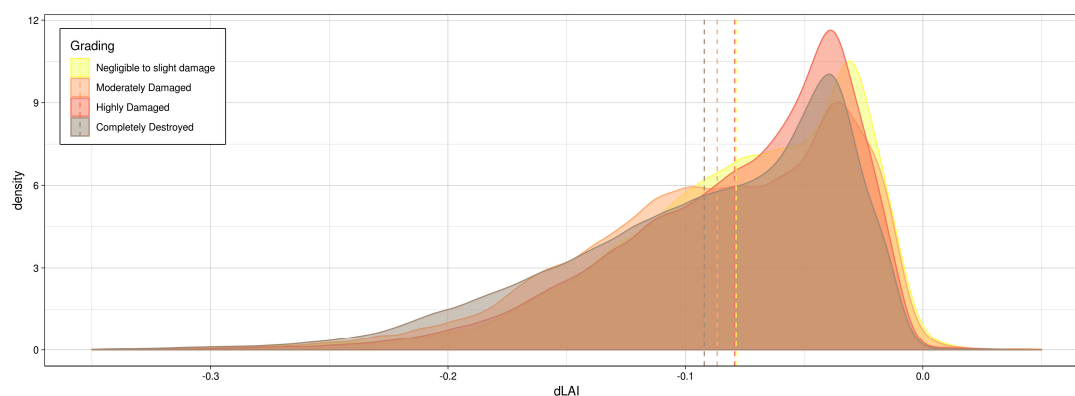

**Figure 4.** Distribution of dLAI values in the identified burned areas with respect to the Copernicus EMS fire grading classes.

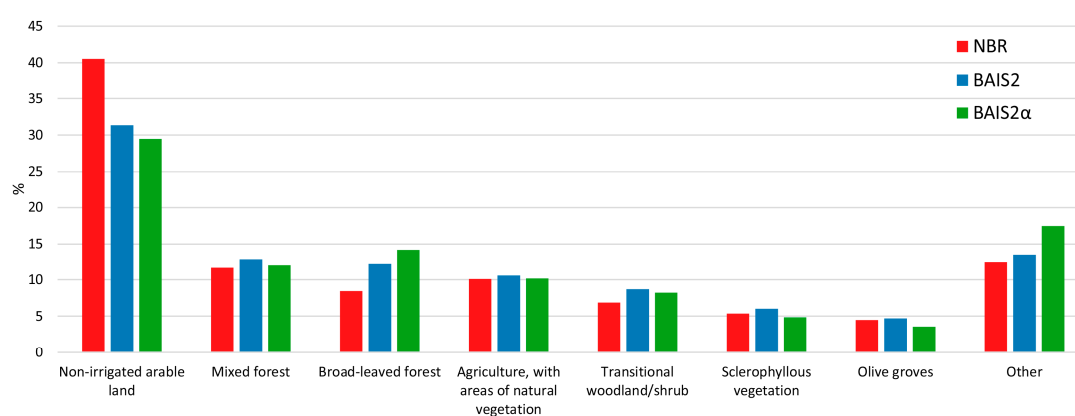

**Figure 5.** Distribution of misclassified burned area pixels with respect to the Corine Land Cover classes (source: CLC 2012).

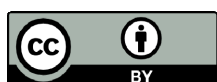

© 2019 by the authors. Submitted for possible open access publication under the terms and conditions of the Creative Commons Attribution (CC BY) license (<http://creativecommons.org/licenses/by/4.0/>).
